# Supplementary material
Source: MDPI journal article supplement (https://www.mdpi.com/2036-7449/15/1/13)
Supplement: s1 [file s1]

**Table S2:** Statistical analysis of clinical parameters for all patients treated with Casirivimab/Imdevimab. Missing data were excluded, causing different numbers for each parameter. Data for all cases can be found in Table S1. Average  $\pm$  standard deviation is shown. For metric parameters significance was determined using Student's T-test, Cross tables were analysed using Fisher's exact test.  $p < 0.1$ : +;  $p < 0.05$ : \*;  $p < 0.01$ : \*\*. Significance signs in "All" in the female table indicate significant difference to the male sex.

| Parameter                         | All patients     |                  |                    |
|-----------------------------------|------------------|------------------|--------------------|
|                                   | All              | untreated        | treated            |
| Number                            | 693              | 94               | 602                |
| Age                               | 64.3 $\pm$ 17.0  | 65.6 $\pm$ 21.2  | 64.1 $\pm$ 16.2    |
| Sex (f/m)                         | 385/308          | 59/37            | 326/271            |
| Female %                          | 55.6 %           | 61.5 %           | 54.6 %             |
| <b>Symptoms</b>                   |                  |                  |                    |
| Coughing (n/y)                    | 276/382          | 54/36            | 222/346 **         |
| % yes                             | 58.1 %           | 40.0 %           | 60.9 %             |
| Dyspnea (n/y)                     | 498/158          | 47/43            | 451/115 **         |
| % yes                             | 24.1 %           | 47.8 %           | 20.3 %             |
| Fatigue (n/y)                     | 488/166          | 69/21            | 419/145            |
| % yes                             | 25.4 %           | 23.3 %           | 25.4 %             |
| Pain (n/y)                        | 417/238          | 70/20            | 347/218 **         |
| % yes                             | 36.3 %           | 22.2 %           | 38.6 %             |
| Inappetence (n/y)                 | 569/87           | 76/14            | 493/73             |
| % yes                             | 13.3 %           | 15.5 %           | 12.9 %             |
| Loss of taste and smell (n/y)     | 598/57           | 86/4             | 512/53             |
| % yes                             | 8.7 %            | 4.4 %            | 9.4 %              |
| Diarrhoea / vomiting (n/y)        | 575/81           | 81/9             | 494/72             |
| % yes                             | 12.3 %           | 10.0 %           | 12.7 %             |
| Fever (n/y)                       | 447/209          | 54/36            | 393/173 +          |
| % yes                             | 31.9 %           | 40 %             | 30.6 %             |
| Temperature                       | 37.3 $\pm$ 1.0   | 37.3 $\pm$ 1.0   | 37.3 $\pm$ 1.0     |
| Neurological Symptoms (n/y) % yes | 620/36           | 84/6             | 536/30             |
| % yes                             | 5.5 %            | 6.7 %            | 5.3 %              |
| Syncope (n/y)                     | 629/27           | 80/10            | 549/17 **          |
| % yes                             | 4.1 %            | 11.1 %           | 3.0 %              |
| <b>Preexisting illness</b>        |                  |                  |                    |
| Hypertension (n/y)                | 299/357          | 44/49            | 255/308            |
| % yes                             | 54.4 %           | 52.7 %           | 54.7 %             |
| Blood pressure systolic           | 127.9 $\pm$ 19.0 | 125.0 $\pm$ 22.2 | 128.3 $\pm$ 18.6   |
| Blood pressure diastolic          | 77.9 $\pm$ 12.3  | 73.6 $\pm$ 11.7  | 78.4 $\pm$ 12.3 ** |
| Cardiac frequency (1/min)         | 82.1 $\pm$ 16.1  | 84.3 $\pm$ 15.7  | 81.4 $\pm$ 16.9    |
| Diabetes (n/y)                    | 519/138          | 69/24            | 450/114            |
| % yes                             | 21.0 %           | 25.8 %           | 20.2 %             |
| Renal insufficiency (n/y)         | 553/102          | 73/20            | 480/82 +           |
| % yes                             | 15.6 %           | 21.5 %           | 14.6 %             |
| COPD/Asthma (n/y)                 | 538/118          | 72/21            | 466/97             |
| % yes                             | 18.0 %           | 22.6 %           | 17.2 %             |
| Active malignoma (n/y)            | 600/57           | 86/7             | 514/50             |
| % yes                             | 8.7 %            | 7.5 %            | 8.9 %              |
| Inactive malignoma (n/y)          | 624/31           | 86/6             | 538/25             |
| % yes                             | 4.7 %            | 6.5 %            | 4.4 %              |

|                                  |               |               |                |
|----------------------------------|---------------|---------------|----------------|
| Immunosuppression (n/y)          | 621/35        | 90/3          | 531/32         |
| % yes                            | 5.3 %         | 3.2 %         | 5.7 %          |
| Obesity (n/y)                    | 537/117       | 73/19         | 464/98         |
| % yes                            | 17.9 %        | 20.7 %        | 17.4 %         |
| Heart disease (n/y)              | 494/160       | 62/31         | 432/129 *      |
| % yes                            | 24.5 %        | 33.3 %        | 23.0 %         |
| Hypothyreosis (n/y)              | 579/75        | 76/16         | 503/59 +       |
| % yes                            | 11.5 %        | 17.4 %        | 10.5 %         |
| <b>Blood gas analysis</b>        |               |               |                |
| pO <sub>2</sub>                  | 10.2 ± 2.8    | 9.7 ± 4.4     | 10.3 ± 2.3     |
| pCO <sub>2</sub>                 | 4.8 ± 0.7     | 4.7 ± 0.9     | 4.8 ± 0.7      |
| O <sub>2</sub> -Saturation %     | 94.0 ± 5.4    | 92.5 ± 4.9    | 94.3 ± 5.4 **  |
| <b>Clinical chemistry</b>        |               |               |                |
| Hemoglobin (mM)                  | 8.4 ± 1.3     | 8.2 ± 1.2     | 8.5 ± 1.3 +    |
| Leukocytes (Gpt/L)               | 6.3 ± 4.6     | 7.5 ± 4.3     | 6.1 ± 4.6 **   |
| Lymphocytes (Gpt/L)              | 1.5 ± 2.2     | 1.5 ± 2.2     | 1.6 ± 2.2      |
| Thrombocytes (Gpt/L)             | 205.7 ± 77.8  | 204.9 ± 88.6  | 205.8 ± 75.8   |
| CRP (mg/L)                       | 39.7 ± 53.5   | 69.2 ± 69.3   | 34.3 ± 48.2 ** |
| proBNP (mg/mL)                   | 2297 ± 4598   | 2413 ± 5191   | 2230 ± 4243    |
| Troponin (ng/mL)                 | 0.05 ± 0.17   | 0.08 ± 0.30   | 0.04 ± 0.09    |
| Blood glucose (mM)               | 8.2 ± 9.9     | 9.6 ± 16.5    | 7.7 ± 5.7      |
| Creatinin(μM)                    | 105.6 ± 109.3 | 111.3 ± 111.4 | 105.7 ± 109.0  |
| GFR (mL/min/1.73m <sup>2</sup> ) | 74.9 ± 28.1   | 72.4 ± 34.0   | 75.3 ± 27.0    |
| PCR (Ct)                         | 24.7 ± 5.3    | 26.7 ± 4.9    | 24.2 ± 5.3 **  |
| Hospitalization (d)              | 5.7 ± 9.0     | 14.4 ± 11.1   | 4.0 ± 7.4 **   |
| Death (n/y)                      | 579/39        | 77/17         | 502/22 **      |
| % yes                            | 6.3 %         | 18.1 %        | 4.2 %          |

| Parameter                     | Female      |             |             |
|-------------------------------|-------------|-------------|-------------|
|                               | All         | untreated   | treated     |
| Number                        | 385         | 59          | 326         |
| Age                           | 66.0 ± 17.2 | 64.7 ± 21.0 | 66.2 ± 16.4 |
| <b>Symptoms</b>               |             |             |             |
| Coughing (n/y)                | 145/205     | 31/22       | 114/138 **  |
| % yes                         | 58.6 %      | 41.5 %      | 61.6 %      |
| Dyspnea (n/y)                 | 262/88      | 25/28       | 237/60 **   |
| % yes                         | 25.1 %      | 52.8 %      | 20.2 %      |
| Fatigue (n/y)                 | 90/349      | 37/16       | 222/74      |
|                               | 25.8 %      | 30.2 %      | 25.0 %      |
| Pain (n/y)                    | 219/130     | 38/15       | 181/115     |
| % yes                         | 37.2 %      | 38.9 %      | 28.3 %      |
| Inappetence (n/y)             | 297/53      | 44/9        | 253/44      |
| % yes                         | 15.1 %      | 17.0 %      | 14.8 %      |
| Loss of taste and smell (n/y) | 317/32      | 52/1        | 265/31 +    |
| % yes                         | 9.2 %       | 1.9 %       | 10.5 %      |
| Diarrhoea / vomitting (n/y)   | 296/54 *    | 46/7        | 250/47      |
| % yes                         | 15.4 %      | 13.2 %      | 15.8 %      |
| Fever (n/y)                   | 240/110     | 31/22       | 209/88      |
| % yes                         | 31.4 %      | 41.5 %      | 29.6 %      |
| Temperature                   | 37.3 ± 1.0  | 37.2 ± 1.0  | 37.4 ± 1.0  |
| Neurological Symptoms         | 326/24      | 49/4        | 277/20      |

|                                  |                |              |                |
|----------------------------------|----------------|--------------|----------------|
| (n/y) % yes                      | 6.9%           | 7.5 %        | 6.7%           |
| Syncope (n/y)                    | 336/14         | 46/7         | 290/7 **       |
| % yes                            | 4.0 %          | 13.2 %       | 2.4 %          |
| <b>Preexisting illness</b>       |                |              |                |
| Hypertension (n/y)               | 163/185        | 27/28        | 136/157        |
| % yes                            | 53.2 %         | 50.9 %       | 53.6 %         |
| Blood pressure systolic          | 127.0 ± 20.5   | 123.9 ± 24.4 | 127.4 ± 20.0   |
| Blood pressure diastolic         | 76.6 ± 12.2    | 72.8 ± 12.4  | 77.1 ± 12.2 *  |
| Cardiac frequency (1/min)        | 82.1 ± 16.1    | 83.7 ± 14.5  | 81.6 ± 16.7    |
| Diabetes (n/y)                   | 286/62 *       | 44/11        | 242/51         |
| % yes                            | 17.8 %         | 20.0 %       | 17.4 %         |
| Renal insufficiency (n/y)        | 291/57         | 45/10        | 246/47         |
| % yes                            | 16.4 %         | 18.2 %       | 16.0 %         |
| COPD/Asthma (n/y)                | 284/64         | 44/11        | 240/53         |
| % yes                            | 18.4 %         | 20.0 %       | 18.1 %         |
| Active malignoma (n/y)           | 325/23 +       | 53/2         | 272/21         |
| % yes                            | 6.6 %          | 3.6 %        | 7.2 %          |
| Inactive malignoma (n/y)         | 332/15         | 50/5         | 282/10 +       |
| % yes                            | 4.3 %          | 9.1 %        | 3.4 %          |
| Immunosuppression (n/y)          | 327/21         | 54/1         | 273/20         |
| % yes                            | 6.0 %          | 1.8 %        | 6.8 %          |
| Obesity (n/y)                    | 280/68         | 40/15        | 240/53         |
| % yes                            | 19.5 %         | 27.3 %       | 18.1 %         |
| Heart disease (n/y)              | 271/75 +       | 38/16        | 232/59         |
| % yes                            | 21.7 %         | 29.1 %       | 20.3 %         |
| Hypothyreosis (n/y)              | 250/57 **      | 42/13        | 248/44         |
| % yes                            | 16.4 %         | 23.6 %       | 15.1 %         |
| <b>Blood gas analysis</b>        |                |              |                |
| pO <sub>2</sub>                  | 10.2 ± 2.3     | 9.1 ± 2.2    | 10.4 ± 2.3 **  |
| pCO <sub>2</sub>                 | 4.8 ± 0.7      | 4.8 ± 1.0    | 4.8 ± 0.7      |
| O <sub>2</sub> -Saturation (%)   | 94.1 ± 5.9     | 92.3 ± 3.9   | 94.5 ± 6.1 *   |
| <b>Clinical chemistry</b>        |                |              |                |
| Hemoglobin (mM)                  | 8.2 ± 1.1 **   | 8.0 ± 1.1    | 8.2 ± 1.1      |
| Leukocytes (Gpt/L)               | 5.9 ± 3.0 *    | 7.1 ± 3.6    | 5.7 ± 2.9 **   |
| Lymphocytes (Gpt/L)              | 1.3 ± 1.0 *    | 1.4 ± 1.3    | 1.2 ± 1.0      |
| Thrombocytes (Gpt/L)             | 211.5 ± 75.4 * | 213.2 ± 88.6 | 211.2 ± 72.5   |
| CRP (mg/L)                       | 35.8 ± 48.0 +  | 56.9 ± 57.8  | 31.2 ± 44.3 ** |
| proBNP (mg/mL)                   | 2255 ± 4232    | 2057 ± 4386  | 2370 ± 4172    |
| Troponin (ng/mL)                 | 0.04 ± 0.10    | 0.04 ± 0.09  | 0.03 ± 0.10    |
| Blood glucose (mM)               | 8.3 ± 12.0     | 10.2 ± 21.1  | 7.5 ± 4.1      |
| Creatinin(μM)                    | 89.3 ± 73.6 ** | 90.5 ± 63.3  | 89.1 ± 75.7    |
| GFR (mL/min/1.73m <sup>2</sup> ) | 75.5 ± 28.4    | 74.8 ± 34.9  | 75.7 ± 26.8    |
| PCR (Ct)                         | 24.9 ± 5.3     | 27.0 ± 5.1   | 24.3 ± 5.2 **  |
| Hospitalization (d)              | 6.4 ± 9.8 +    | 16.2 ± 11.9  | 4.2 ± 7.8 **   |
| Death (n/y)                      | 304/19         | 51/6         | 253/13         |
| % yes                            | 5.9 %          | 10.5 %       | 4.9 %          |
| <b>Parameter</b>                 |                |              |                |
|                                  | All            | untreated    | treated        |
| Number                           | 308            | 37           | 271            |
| Age                              | 62.3 ± 14.5    | 66.9 ± 21.7  | 61.7 ± 15.6    |
| <b>Symptoms</b>                  |                |              |                |

|                                   |                 |               |                 |
|-----------------------------------|-----------------|---------------|-----------------|
| Coughing (n/y)                    | 131/177         | 23/14         | 108/163 *       |
| % yes                             | 57.5 %          | 37.8 %        | 60.1 %          |
| Dyspnea (n/y)                     | 236/70          | 22/15         | 214/55 *        |
| % yes                             | 22.9 %          | 40.5 %        | 20.4 %          |
| Fatigue (n/y)                     | 229/76          | 32/5          | 197/71          |
|                                   | 24.9 %          | 13.5 %        | 26.5 %          |
| Pain (n/y)                        | 198/108         | 32/5          | 166/103 **      |
| % yes                             | 35.3 %          | 13.5 %        | 38.3 %          |
| Inappetence (n/y)                 | 272/34          | 32/5          | 240/29          |
| % yes                             | 11.1 %          | 13.5 %        | 10.8 %          |
| Loss of taste and smell (n/y)     | 281/25          | 34/3          | 247/22          |
| % yes                             | 8.2 %           | 8.1 %         | 8.2 %           |
| Diarrhoea / vomiting (n/y)        | 279/27          | 35/2          | 244/25          |
| % yes                             | 8.8 %           | 5.4 %         | 9.3 %           |
| Fever (n/y)                       | 207/99          | 23/14         | 184/85          |
| % yes                             | 32.4 %          | 37.8 %        | 31.6 %          |
| Temperature                       | 37.3 ± 1.0      | 37.4 ± 1.0    | 37.3 ± 1.0      |
| Neurological Symptoms (n/y) % yes | 294/12<br>3.9 % | 35/2<br>5.4 % | 295/10<br>3.7 % |
| Syncope (n/y)                     | 293/13          | 34/3          | 259/10          |
| % yes                             | 4.2 %           | 8.1 %         | 3.7 %           |
| <b>Preexisting illness</b>        |                 |               |                 |
| Hypertension (n/y)                | 136/172         | 17/21         | 119/151         |
| % yes                             | 55.8 %          | 55.3 %        | 55.9            |
| Blood pressure systolic           | 129.1 ± 17.0    | 127.0 ± 18.1  | 129.3 ± 17.0    |
| Blood pressure diastolic          | 79.4 ± 12.2     | 75.1 ± 10.3   | 79.8 ± 12.3     |
| Cardiac frequency (1/min)         | 82.0 ± 17.3     | 85.3 ± 17.9   | 81.2 ± 17.2     |
| Diabetes (n/y)                    | 233/76          | 25/13         | 208/63          |
| % yes                             | 24.6 %          | 34.2 %        | 23.2 %          |
| Renal insufficiency (n/y)         | 262/45          | 28/10         | 234/35 *        |
| % yes                             | 14.7 %          | 26.3 %        | 13.0 %          |
| COPD/Asthma (n/y)                 | 254/54          | 28/10         | 226/44          |
| % yes                             | 17.5 %          | 26.3 %        | 16.3 %          |
| Active malignoma (n/y)            | 275/34          | 33/5          | 242/29          |
| % yes                             | 11.0 %          | 13.2 %        | 10.7 %          |
| Inactive malignoma (n/y)          | 292/16          | 36/1          | 256/15          |
| % yes                             | 5.2 %           | 2.7 %         | 5.5 %           |
| Immunosuppression (n/y)           | 294/14          | 36/2          | 258/12          |
| % yes                             | 4.5 %           | 5.3 %         | 4.4 %           |
| Obesity (n/y)                     | 257/49          | 33/4          | 224/45          |
| % yes                             | 16.0 %          | 10.8 %        | 16.7 %          |
| Heart disease (n/y)               | 223/85          | 23/15         | 200/70          |
| % yes                             | 27.6 %          | 39.5 %        | 25.9 %          |
| Hypothyreosis (n/y)               | 289/18          | 34/3          | 255/15          |
| % yes                             | 5.9 %           | 8.1 %         | 5.6 %           |
| <b>Blood gas analysis</b>         |                 |               |                 |
| pO <sub>2</sub>                   | 10.2 ± 3.2      | 10.5 ± 6.4    | 10.1 ± 2.4      |
| pCO <sub>2</sub>                  | 4.8 ± 0.7       | 4.7 ± 0.8     | 4.8 ± 0.6       |
| O <sub>2</sub> -Saturation (%)    | 93.9 ± 4.7      | 92.8 ± 6.2    | 94.1 ± 4.5      |
| <b>Clinical chemistry</b>         |                 |               |                 |
| Hemoglobin (mM)                   | 8.7 ± 1.4       | 8.5 ± 1.4     | 8.7 ± 1.4       |

|                                  |               |               |                |
|----------------------------------|---------------|---------------|----------------|
| Leukocytes (Gpt/L)               | 6.7 ± 5.8     | 8.0 ± 5.2     | 6.5 ± 5.8      |
| Lymphocytes (Gpt/L)              | 1.9 ± 2.9     | 1.8 ± 3.2     | 1.9 ± 2.9      |
| Thrombocytes (Gpt/L)             | 199 ± 80      | 191.7 ± 88.3  | 200.0 ± 78.9   |
| CRP (mg/L)                       | 44.2 ± 59.0   | 88.7 ± 81.4   | 37.6 ± 52.0 ** |
| proBNP (mg/mL)                   | 2355 ± 5091   | 2911 ± 6209   | 2038 ± 4380    |
| Troponin (ng/mL)                 | 0.06 ± 0.23   | 0.14 ± 0.47   | 0.04 ± 0.08    |
| Blood glucose (mM)               | 8.1 ± 6.5     | 8.8 ± 4.2     | 7.9 ± 7.1      |
| Creatinin(μM)                    | 126.4 ± 136.9 | 142.2 ± 154.1 | 124.0 ± 134.3  |
| GFR (mL/min/1.73m <sup>2</sup> ) | 74.1 ± 27.9   | 68.8 ± 32.8   | 74.9 ± 27.1    |
| Hospitalization (d)              | 4.9 ± 7.9     | 11.9 ± 9.5    | 3.8 ± 7.0 **   |
| PCR (Ct)                         | 24.5 ± 5.3    | 26.2 ± 4.6    | 24.1 ± 5.4 *   |
| Death (n/y)                      | 275/20        | 26/11         | 249/9 **       |
| % yes                            | 6.8 %         | 29.7 %        | 3.5 %          |
