# Supplementary material
Source: MDPI journal article supplement (https://www.mdpi.com/2036-7449/15/1/13)
Supplement: s1 [file s1]

**Table S1:** Statistical analysis of clinical parameters for all patients included. Missing data were excluded, causing different numbers for each parameter. Average  $\pm$  standard deviation is shown. For metric parameters significance was determined using Student's T-test, Cross tables were analysed using Fisher's exact test.  $p < 0.1$ : +;  $p < 0.05$ : \*;  $p < 0.01$ : \*\*

| Parameter                     |       | All patients |             |                |
|-------------------------------|-------|--------------|-------------|----------------|
|                               |       | All          | untreated   | treated        |
| Number                        |       | 752          | 98          | 654            |
| Age                           |       | 64.7 ± 16.9  | 65.6 ± 21.2 | 64.6 ± 16.2    |
| Symptoms                      |       |              |             |                |
| Coughing (n/y)                |       | 292/410      | 54/36       | 238/374 **     |
| % yes                         |       | 58.4 %       | 40.0 %      | 61.1 %         |
| Dyspnea (n/y)                 |       | 529/170      | 47/43       | 482/172 **     |
| % yes                         |       | 24.3 %       | 47.8 %      | 26.3 %         |
| Fatigue (n/y)                 |       | 510/187      | 69/21       | 441/166        |
|                               |       | 26.8%        | 23.3 %      | 27.3 %         |
| Pain (n/y)                    |       | 451/248      | 70/20       | 381/228 **     |
| % yes                         |       | 35.5 %       | 22.2 %      | 37.4 %         |
| Inappetence (n/y)             |       | 600/99       | 76/14       | 524/85         |
| % yes                         |       | 14.2 %       | 15.6 %      | 14.0 %         |
| Loss of taste and smell (n/y) |       | 637/61       | 86/4        | 551/57         |
| % yes                         |       | 8.7 %        | 4.4 %       | 9.4 %          |
| Diarrhoea / vomitting (n/y)   |       | 612/88       | 81/9        | 531/79         |
| % yes                         |       | 12.6 %       | 10.0 %      | 13.0 %         |
| Fever (n/y)                   |       | 478/221      | 54/36       | 424/185 +      |
| % yes                         |       | 31.6 %       | 40.0 %      | 30.4 %         |
| Temperature                   |       | 37.3 ± 1.0   | 37.3 ± 1.0  | 37.3 ± 1.0     |
| Neurological Symptoms (n/y)   |       | 656/42       | 84/6        | 572/36         |
|                               | % yes | 6.0 %        | 6.7 %       | 5.9 %          |
| Syncope (n/y)                 |       | 669/30       | 80/10       | 589/20 **      |
| % yes                         |       | 4.3 %        | 11.1 %      | 3.3 %          |
| Preexisting illness           |       |              |             |                |
| Hypertension (n/y)            |       | 314/386      | 44/49       | 270/337        |
| % yes                         |       | 55.1 %       | 52.7 %      | 55.5 %         |
| Blood pressure systolic       |       | 128.3 ± 19.0 | 125 ± 2.8   | 128.7 ± 0.8    |
| Blood pressure diastolic      |       | 77.9 ± 12.3  | 73.6 ± 11.7 | 78.4 ± 12.3 ** |
| Cardiac frequency (1/min)     |       | 81.7 ± 16.2  | 84.3 ± 1.9  | 81.0 ± 1.0     |
| Diabetes (n/y)                |       | 547/154      | 69/24       | 478/130        |
| % yes                         |       | 22.0 %       | 25.8 %      | 21.4 %         |
| Renal insufficiency (n/y)     |       | 586/113      | 73/20       | 513/93         |
| % yes                         |       | 16.2 %       | 21.5 %      | 15.3 %         |
| COPD/Asthma (n/y)             |       | 569/130      | 72/21       | 497/109        |
| % yes                         |       | 18.6 %       | 22.6 %      | 18.0 %         |
| Active malignoma (n/y)        |       | 640/61       | 86/7        | 554/54         |
| % yes                         |       | 8.7 %        | 7.5 %       | 8.9 %          |
| Inactive malignoma (n/y)      |       | 664/37       | 86/6        | 578/28         |
| % yes                         |       | 5.3 %        | 6.5 %       | 4.6 %          |
| Immunosuppression (n/y)       |       | 661/39       | 90/3        | 571/36         |
| % yes                         |       | 5.6 %        | 3.2 %       | 5.9 %          |
| Obesity (n/y)                 |       | 560/137      | 73/19       | 487/118        |

|                                  |                  |                  |               |
|----------------------------------|------------------|------------------|---------------|
| % yes                            | 19.7 %           | 20.7 %           | 19.5 %        |
| Heart disease (n/y)              | 522/174          | 62/31            | 460/143 +     |
| % yes                            | 25 %             | 33.3 %           | 23.7 %        |
| Hypothyreosis (n/y)              | 608/88           | 76/16            | 532/72        |
| % yes                            | 12.6 %           | 17.4 %           | 11.9 %        |
| <b>Blood gas analysis</b>        |                  |                  |               |
| pO <sub>2</sub>                  | 10.2 ± 2.7       | 9.7 ± 4.4        | 10.3 ± 2.3    |
| pCO <sub>2</sub>                 | 4.9 ± 2.0        | 4.7 ± 0.9        | 5.0 ± 2.1     |
| O <sub>2</sub> -Saturation %     | 95.2 ± 30.8      | 92.5 ± 4.9       | 95.6 ± 33.1   |
| <b>Clinical chemistry</b>        |                  |                  |               |
| Hemoglobin (mM)                  | 8.4 ± 4.0        | 8.2 ± 1.2        | 8.4 ± 1.3 +   |
| Leukocytes (Gpt/L)               | 6.5 ± 8.0        | 7.5 ± 0.4        | 6.0 ± 4.5 **  |
| Lymphocytes (Gpt/L)              | 1.6 ± 2.2        | 1.5 ± 2.2        | 1.6 ± 2.2     |
| Thrombocytes (Gpt/L)             | 205.5 ± 78.5     | 204.9 ± 88.6     | 206.6 ± 76.3  |
| CRP (mg/L)                       | 39.5 ± 52.7      | 69.2 ± 69.3      | 34.4 ± 47.6   |
|                                  |                  |                  | **            |
| proBNP (mg/mL)                   | 2149 ± 4393      | 2413 ± 5191      | 2025 ± 3981   |
| Troponin (ng/mL)                 | 0.045 ± 0.16     | 0.08 ± 0.30      | 0.036 ± 0.09  |
| Blood glucose (mM)               | 8.1 ± 9.4        | 9.6 ± 0.3        | 7.6 ± 0.1     |
| Creatinin(μM)                    | 106.4 ±<br>106.5 | 111.3 ±<br>111.4 | 105.6 ± 105.8 |
| GFR (mL/min/1.73m <sup>2</sup> ) | 74.2 ± 28.1      | 72.4 ± 34.0      | 74.5 ± 27.0   |
| RT-PCR (Ct)                      | 24.7 ± 5.2       | 26.7 ± 4.9       | 24.3 ± 5.2 ** |
| Hospitalization (d)              | 5.9 ± 9.0        | 14.4 ± 11.1      | 4.5 ± 7.8 **  |
| Death (n/y)                      | 622/40           | 77/17            | 545/23 **     |
| % yes                            | 6.0 %            | 18.1 %           | 4.1 %         |

| Parameter                     | Female      |             |             |
|-------------------------------|-------------|-------------|-------------|
|                               | All         | untreated   | treated     |
| Number                        | 406         | 59          | 347         |
| Age                           | 66.3 ± 17.1 | 64.7 ± 21.0 | 66.6 ± 13.3 |
| <b>Symptoms</b>               |             |             |             |
| Coughing (n/y)                | 153/218     | 31/22       | 122/196 **  |
| % yes                         | 58.7 %      | 41.5 %      | 61.6 %      |
| Dyspnea (n/y)                 | 275/96      | 25/28       | 250/68 **   |
| % yes                         | 25.9 %      | 52.8 %      | 21.4 %      |
| Fatigue (n/y)                 | 269/101     | 37/16       | 232/85      |
|                               | 27.3 %      | 30.2 %      | 26.8 %      |
| Pain (n/y)                    | 234/136     | 38/15       | 196/121     |
| % yes                         | 36.8 %      | 28.3 %      | 38.2 %      |
| Inappetence (n/y)             | 311/60      | 44/9        | 267/51      |
| % yes                         | 16.2 %      | 17.0 %      | 16.0 %      |
| Loss of taste and smell (n/y) | 338/32      | 52/1        | 286/31 +    |
| % yes                         | 8.6 %       | 1.9 %       | 9.8 %       |
| Diarrhoea / vomitting (n/y)   | 313/58      | 46/7        | 267/51      |
| % yes                         | 15.6 %      | 13.2 %      | 16.0 %      |
| Fever (n/y)                   | 255/116     | 31/22       | 224/94      |
| % yes                         | 31.2 %      | 41.5 %      | 29.6 %      |
| Temperature                   | 37.3 ± 1.0  | 37.3 ± 1.0  | 37.4 ± 1.0  |
| Neurological Symptoms         | 345/26      | 49/4        | 296/22      |

|                                  |              |              |                |
|----------------------------------|--------------|--------------|----------------|
| (n/y) % yes                      | 7.0 %        | 7.5 %        | 6.9 %          |
| Syncope (n/y)                    | 355/16       | 46/7         | 309/9 **       |
| % yes                            | 4.3 %        | 13.2 %       | 2.8 %          |
| <b>Preexisting illness</b>       |              |              |                |
| Hypertension (n/y)               | 172/197      | 27/28        | 145/169        |
| % yes                            | 53.4 %       | 50.9 %       | 53.8 %         |
| Blood pressure systolic          | 127.5 ± 20.4 | 123.9 ± 24.4 | 128.0 ± 19.8   |
| Blood pressure diastolic         | 76.8 ± 12.6  | 72.8 ± 12.4  | 77.6 ± 12.3 *  |
| Cardiac frequency (1/min)        | 82.1 ± 15.7  | 83.7 ± 15.5  | 81.6 ± 16.0    |
| Diabetes (n/y)                   | 298/71       | 44/11        | 254/60         |
| % yes                            | 19.2 %       | 20.0 %       | 19.2 %         |
| Renal insufficiency (n/y)        | 308/61       | 45/10        | 263/51         |
| % yes                            | 16.5 %       | 18.2 %       | 16.2 %         |
| COPD/Asthma (n/y)                | 298/71       | 44/11        | 154/60         |
| % yes                            | 19.2 %       | 20.0 %       | 29.4 %         |
| Active malignoma (n/y)           | 344/25       | 53/2         | 291/23         |
| % yes                            | 6.8 %        | 3.6 %        | 7.3 %          |
| Inactive malignoma (n/y)         | 351/15       | 50/5         | 301/10 +       |
| % yes                            | 4.1 %        | 9.1 %        | 3.2 %          |
| Immunosuppression (n/y)          | 346/23       | 54/1         | 292/22         |
| % yes                            | 6.2 %        | 1.8 %        | 7.0 %          |
| Obesity (n/y)                    | 290/79       | 40/15        | 250/64         |
| % yes                            | 21.4 %       | 27.3 %       | 20.4 %         |
| Heart disease (n/y)              | 285/81       | 39/16        | 246/65         |
| % yes                            | 22.1 %       | 29.0 %       | 20.9 %         |
| Hypothyreosis (n/y)              | 301/65       | 42/13        | 259/52         |
| % yes                            | 17.8 %       | 23.6 %       | 16.7 %         |
| <b>Blood gas analysis</b>        |              |              |                |
| pO <sub>2</sub>                  | 10.2 ± 2.3   | 9.1 ± 2.2    | 10.4 ± 2.3 **  |
| pCO <sub>2</sub>                 | 4.8 ± 0.7    | 4.8 ± 0.9    | 4.9 ± 0.7      |
| O <sub>2</sub> -Saturation %     | 94.1 ± 5.8   | 92.3 ± 3.9   | 94.4 ± 6.0 *   |
| <b>Clinical chemistry</b>        |              |              |                |
| Hemoglobin (mM)                  | 8.2 ± 1.1    | 8.0 ± 1.1    | 8.2 ± 1.1      |
| Leukocytes (Gpt/L)               | 5.9 ± 0.2    | 7.1 ± 3.6    | 5.6 ± 2.8 **   |
| Lymphocytes (Gpt/L)              | 1.2 ± 0.1    | 1.4 ± 1.4    | 1.2 ± 0.9      |
| Thrombocytes (Gpt/L)             | 210.4 ± 74.9 | 213.9 ± 88.6 | 209.8 ± 22.1   |
| CRP (mg/L)                       | 35.8 ± 47.2  | 56.9 ± 57.8  | 31.5 ± 53.6 ** |
| proBNP (mg/mL)                   | 2052 ± 4032  | 2057 ± 4386  | 2048 ± 3880    |
| Troponin (ng/mL)                 | 0.034 ± 0.01 | 0.045 ± 0.09 | 0.031 ± 0.09 * |
| Blood glucose (mM)               | 8.2 ± 0.9    | 10.2 ± 21.1  | 7.5 ± 4.0      |
| Creatinin(μM)                    | 88.9 ± 4.0   | 90.5 ± 63.3  | 89.8 ± 74.3    |
| GFR (mL/min/1.73m <sup>2</sup> ) | 74.7 ± 1.6   | 74.7 ± 35.0  | 74.7 ± 27.0    |
| RT-PCR (Ct)                      | 24.9 ± 5.2   | 27.0 ± 5.1   | 24.3 ± 5.1 **  |
| Hospitalization (d)              | 6.5 ± 9.8    | 16.1 ± 12.0  | 4.6 ± 8.1 **   |
| Death (n/y)                      | 325/19       | 51/6         | 274/13         |
| % yes                            | 5.5 %        | 10.5 %       | 4.5 %          |

| Parameter       | Male        |             |             |
|-----------------|-------------|-------------|-------------|
|                 | All         | untreated   | treated     |
| Number          | 346         | 39          | 307         |
| Age             | 62.9 ± 16.5 | 66.9 ± 21.7 | 62.4 ± 15.7 |
| <b>Symptoms</b> |             |             |             |

|                                   |              |              |              |
|-----------------------------------|--------------|--------------|--------------|
| Coughing (n/y)                    | 139/192      | 23/14        | 116/178 *    |
| % yes                             | 58.0 %       | 37.8 %       | 60.5 %       |
| Dyspnea (n/y)                     | 254/74       | 22/15        | 232/59 *     |
| % yes                             | 22.6 %       | 40.5 %       | 20.3 %       |
| Fatigue (n/y)                     | 241/86       | 32/5         | 209/81 +     |
| % yes                             | 26.3 %       | 13.5 %       | 27.9 %       |
| Pain (n/y)                        | 217/112      | 32/5         | 185/107 **   |
| % yes                             | 34.0 %       | 13.5 %       | 36.6 %       |
| Inappetence (n/y)                 | 289/39       | 32/5         | 257/34       |
| % yes                             | 11.9 %       | 13.5 %       | 11.7 %       |
| Loss of taste and smell (n/y)     | 299/29       | 34/3         | 265/26       |
| % yes                             | 8.8 %        | 8.1 %        | 8.9 %        |
| Diarrhoea / vomiting (n/y)        | 299/30       | 35/2         | 264/28       |
| % yes                             | 9.1 %        | 5.4 %        | 9.6 %        |
| Fever (n/y)                       | 223/105      | 23/14        | 200/91       |
| % yes                             | 32.0 %       | 37.8 %       | 31.3 %       |
| Temperature                       | 37.3 ± 1.0   | 37.4 ± 1.0   | 37.3 ± 1.0   |
| Neurological Symptoms (n/y) % yes | 312/16       | 35/2         | 277/14       |
| % yes                             | 4.5 %        | 5.4 %        | 4.8 %        |
| Syncope (n/y)                     | 314/14       | 34/3         | 280/11       |
| % yes                             | 4.3 %        | 8.1 %        | 3.8 %        |
| <b>Preexisting illness</b>        |              |              |              |
| Hypertension (n/y)                | 142/189      | 17/21        | 125/168      |
| % yes                             | 57.1 %       | 55.3 %       | 57.3 %       |
| Blood pressure systolic           | 129.2 ± 17.3 | 127.0 ± 18.1 | 129.4 ± 17.3 |
| Blood pressure diastolic          | 79.2 ± 12.2  | 75.1 ± 10.3  | 79.5 ± 10.3  |
| Cardiac frequency (1/min)         | 81.1 ± 17.0  | 85.3 ± 17.9  | 80.2 ± 16.7  |
| Diabetes (n/y)                    | 249/83       | 25/13        | 224/70       |
| % yes                             | 25.0 %       | 34.2 %       | 23.8 %       |
| Renal insufficiency (n/y)         | 278/52       | 28/10        | 250/42 +     |
| % yes                             | 15.8 %       | 26.3 %       | 14.4 %       |
| COPD/Asthma (n/y)                 | 271/59       | 28/10        | 243/49       |
| % yes                             | 17.9 %       | 26.3 %       | 16.8 %       |
| Active malignoma (n/y)            | 296/36 +     | 33/5         | 263/31       |
| % yes                             | 10.8 %       | 13.2 %       | 10.5 %       |
| Inactive malignoma (n/y)          | 313/19       | 36/1         | 277/18       |
| % yes                             | 5.7 %        | 2.7 %        | 6.1 %        |
| Immunosuppression (n/y)           | 315/16       | 36/2         | 279/14       |
| % yes                             | 4.8 %        | 5.3 %        | 4.8 %        |
| Obesity (n/y)                     | 270/58       | 33/4         | 237/54       |
| % yes                             | 17.7 %       | 10.8 %       | 18.6 %       |
| Heart disease (n/y)               | 237/93 +     | 23/15        | 214/78       |
| % yes                             | 28.2 %       | 39.5 %       | 26.7 %       |
| Hypothyreosis (n/y)               | 307/23 **    | 34/3         | 273/20       |
| % yes                             | 7.0 %        | 8.1 %        | 6.8 %        |
| <b>Blood gas analysis</b>         |              |              |              |
| pO <sub>2</sub>                   | 10.2 ± 3.1   | 10.5 ± 6.4   | 10.1 ± 2.4   |
| pCO <sub>2</sub>                  | 4.8 ± 0.7    | 4.7 ± 0.8    | 4.8 ± 0.7    |
| O <sub>2</sub> -Saturation %      | 94.0 ± 4.6   | 92.8 ± 6.2   | 94.1 ± 4.4   |
| <b>Clinical chemistry</b>         |              |              |              |
| Hemoglobin (mM)                   | 8.7 ± 1.4    | 8.5 ± 1.4    | 8.7 ± 1.4    |

|                                  |               |               |                   |
|----------------------------------|---------------|---------------|-------------------|
| Leukocytes (Gpt/L)               | 6.6 ± 5.6     | 8.0 ± 5.2     | 6.5 ± 5.7         |
| Lymphocytes (Gpt/L)              | 1.9 ± 3.0     | 1.8 ± 3.2     | 2.0 ± 3.0         |
| Thrombocytes (Gpt/L)             | 200.1 ± 81.3  | 191.7 ± 88.3  | 201.2 ± 80.4      |
| CRP (mg/L)                       | 43.7 ± 58.2   | 88.7 ± 81.4   | 37.5 ± 51.5<br>** |
| proBNP (mg/mL)                   | 2278 ± 4852   | 2911 ± 6209   | 1995 ± 4142       |
| Troponin (ng/mL)                 | 0.060 ± 0.22  | 0.137 ± 0.47  | 0.041 ± 0.08      |
| Blood glucose (mM)               | 8.0 ± 6.1     | 8.8 ± 4.2     | 7.7 ± 6.5         |
| Creatinin(μM)                    | 125.1 ± 132.7 | 142.2 ± 154.1 | 122.7 ± 129.5     |
| GFR (mL/min/1.73m <sup>2</sup> ) | 73.7 ± 27.7   | 68.8 ± 32.8   | 74.3 ± 26.0       |
| RT-PCR (Ct)                      | 24.5 ± 5.3    | 26.6 ± 4.6    | 24.2 ± 5.3 *      |
| Hospitalization (d)              | 5.3 ± 8.1     | 11.9 ± 9.5    | 4.4 ± 7.4 **      |
| Death (n/y)                      | 297/21        | 26/11         | 271/10 **         |
| % yes                            | 6.6 %         | 29.7 %        | 3.6 %             |
