# Supplementary material
Source: MDPI journal article supplement (https://www.mdpi.com/2036-7449/15/1/13)
Supplement: s1 [file s1]

Figure S1: Recruited patients and treatments in this study.

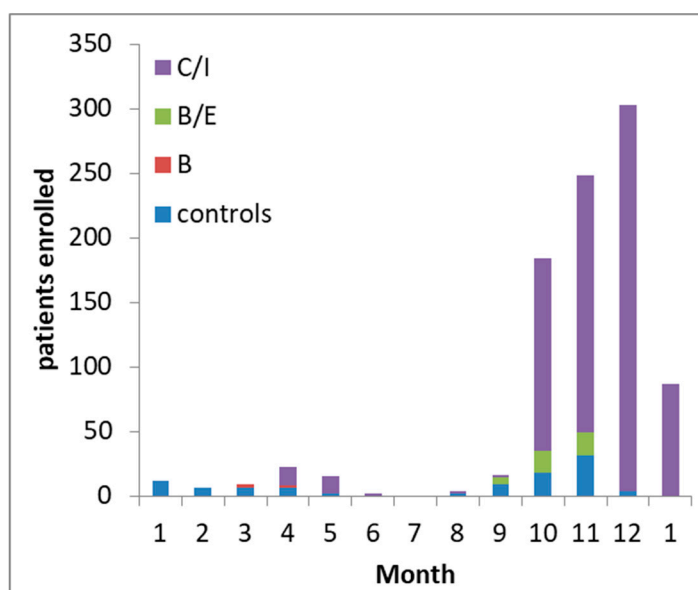

| Time period                | Number patients | mAb  |
|----------------------------|-----------------|------|
| January 22 – May 22        | 32              | none |
| March 22 – April 22        | 5               | B    |
| April 22 – January 23      | 618             | C/I  |
| September 22 – November 22 | 40              | B/E  |
| August 22 – December 22    | 64              | none |

B: Bamlanivimab

C/I: Casirivimab/Imdevimab

B/E: Bamlanivimab/ Etesevimab
