# Supplementary material
Source: MDPI journal article supplement (https://www.mdpi.com/2036-7449/15/1/13)
Supplement: s1 [file s1]

**Table S3:** Statistical analysis of clinical parameters for hospitalized patients. Missing data were excluded, causing different numbers for each parameter. Average  $\pm$  standard deviation is shown. For metric parameters, significance was determined using Student's T-test, Cross tables were analysed using Fisher's exact test.  $p < 0.1$ : +;  $p < 0.05$ : \*;  $p < 0.01$ : \*\*

| Parameter                     |             | All patients     |                                        |
|-------------------------------|-------------|------------------|----------------------------------------|
|                               |             | All              | untreated      treated                 |
| Number                        |             | 350              | 90      260                            |
| Age                           |             | 67.7 $\pm$ 16.7  | 66.9 $\pm$ 20.9      68.0 $\pm$ 15.1   |
| <b>Symptoms</b>               |             |                  |                                        |
| Coughing (n/y)                |             | 157/179          | 52/31      105/148 **                  |
| % yes                         |             | 53.3 %           | 37.3 %      58.5 %                     |
| Dyspnea (n/y)                 |             | 229/107          | 44/39      185/68 **                   |
| % yes                         |             | 31.8 %           | 47.0 %      26.9%                      |
| Fatigue (n/y)                 |             | 218/117          | 63/20      155/97 *                    |
| % yes                         |             | 34.9 %           | 24.1 %      38.5 %                     |
| Pain (n/y)                    |             | 241/94           | 67/16      174/78 *                    |
| % yes                         |             | 28.1 %           | 19.3 %      31.0 %                     |
| Inappetenz (n/y)              |             | 273/63           | 71/12      202/51                      |
| % yes                         |             | 18.8 %           | 14.5 %      20.2 %                     |
| Loss of taste and smell (n/y) |             | 309/26           | 79/4      230/22                       |
| % yes                         |             | 7.8 %            | 4.8 %      8.7 %                       |
| Diarrhoea / vomiting (n/y)    |             | 291/45           | 74/9      217/36                       |
| % yes                         |             | 13.4 %           | 10.8 %      14.2 %                     |
| Fever (n/y)                   |             | 211/125          | 49/43      162/91                      |
| % yes                         |             | 37.2 %           | 41.0 %      36.0 %                     |
| Temperature                   |             | 37.3 $\pm$ 1.0   | 37.3 $\pm$ 0.9      37.3 $\pm$ 1.0     |
| Neurological                  | Symptoms    | 310/26           | 78/5      232/21                       |
|                               | (n/y) % yes | 7.7 %            | 6.0 %      8.3 %                       |
| Syncope (n/y)                 |             | 311/25           | 73/10      238/15 +                    |
| % yes                         |             | 7.4 %            | 12.0 %      5.9 %                      |
| <b>Risk factors</b>           |             |                  |                                        |
| Hypertension (n/y)            |             | 140/202          | 39/47      101/57                      |
| % yes                         |             | 59.1 %           | 54.7 %      60.5 %                     |
| Blood pressure systolic       |             | 128.3 $\pm$ 20.3 | 124.9 $\pm$ 20.4      129.1 $\pm$ 19.6 |
| Blood pressure diastolic      |             | 76.8 $\pm$ 12.9  | 73.4 $\pm$ 11.7      77.7 $\pm$ 13.1 * |
| Cardiac frequency (1/min)     |             | 81.8 $\pm$ 16.2  | 83.5 $\pm$ 15.7      81.2 $\pm$ 16.3   |
| Diabetes (n/y)                |             | 254/88           | 62/24      192/64                      |
| % yes                         |             | 25.7 %           | 27.9 %      25.0 %                     |
| Renal insufficiency (n/y)     |             | 274/67           | 67/19      207/48                      |
| % yes                         |             | 19.6 %           | 22.1 %      18.8 %                     |
| COPD/Asthma (n/y)             |             | 267/74           | 65/21      202/53                      |
| % yes                         |             | 21.7 %           | 24.4 %      20.8 %                     |
| Active malignoma (n/y)        |             | 311/31           | 79/7      232/24                       |
| % yes                         |             | 9.1 %            | 8.1 %      9.4 %                       |
| Inactive malignoma (n/y)      |             | 318/23           | 83/3      235/20                       |
| % yes                         |             | 6.7 %            | 3.5 %      7.8 %                       |
| Immunosuppression (n/y)       |             | 262/76           | 68/17      194/59                      |
| % yes                         |             | 22.5 %           | 20 %      23.3 %                       |
| Obesity (n/y)                 |             | 229/109          | 56/30      173/79                      |
| % yes                         |             | 32.2 %           | 34.9 %      31.3 %                     |

|                                  |               |               |                |
|----------------------------------|---------------|---------------|----------------|
| Heart disease (n/y)              | 323/16        | 80/5          | 243/11         |
| % yes                            | 4.7 %         | 5.9 %         | 4.3 %          |
| Hypothyreosis (n/y)              | 283/56        | 69/16         | 214/40         |
| % yes                            | 16.5 %        | 18.8 %        | 15.7 %         |
| <b>Blood gas analysis</b>        |               |               |                |
| pO <sub>2</sub>                  | 10.0 ± 3.2    | 9.7 ± 4.5     | 10.1 ± 2.6     |
| pCO <sub>2</sub>                 | 4.7 ± 0.8     | 4.7 ± 0.8     | 4.7 ± 0.8      |
| O <sub>2</sub> -Saturation %     | 93.5 ± 4.7    | 92.3 ± 4.9    | 94.0 ± 4.6 **  |
| <b>Clinical chemistry</b>        |               |               |                |
| Hemoglobin (mM)                  | 8.2 ± 1.3     | 8.2 ± 1.2     | 8.2 ± 1.3      |
| Leukocytes (Gpt/L)               | 6.7 ± 5.8     | 7.6 ± 4.4     | 6.4 ± 6.2      |
| Lymphocytes (Gpt/L)              | 1.3 ± 1.7     | 1.3 ± 1.9     | 1.3 ± 1.6      |
| Thrombocytes (Gpt/L)             | 200.9 ± 80.9  | 208.4 ± 90.3  | 198.3 ± 77.3   |
| CRP (mg/L)                       | 50.4 ± 56.4   | 66.7 ± 69.4   | 43.3 ± 49.0 ** |
| proBNP (mg/mL)                   | 2392 ± 4728   | 2543 ± 5347   | 2308 ± 4374    |
| Troponin (ng/mL)                 | 0.05 ± 0.19   | 0.08 ± 0.3    | 0.04 ± 0.1     |
| Blood glucose (mM)               | 8.2 ± 10.4    | 9.8 ± 17.0    | 7.5 ± 3.9      |
| Creatinin(μM)                    | 120.3 ± 132.8 | 115.1 ± 115.0 | 122.2 ± 139.0  |
| GFR (mL/min/1.73m <sup>2</sup> ) | 68.8 ± 29.1   | 70.1 ± 33.8   | 68.3 ± 27.3    |
| RT-PCR (Ct)                      | 24.7 ± 5.2    | 26.9 ± 5.1    | 24.2 ± 5.1 **  |
| Hospitalization (d)              | 10.4 ± 9.8    | 14.4 ± 11.1   | 9.1 ± 9.0 **   |
| Death (n/y)                      | 310/34        | 71/16         | 293/18 **      |
| % yes                            | 9.9 %         | 18.4 %        | 7.0 %          |

| Parameter                         |             | Female      |             |
|-----------------------------------|-------------|-------------|-------------|
| Number                            | All         | untreated   | treated     |
| Age                               | 185         | 52          | 133         |
| <b>Symptoms</b>                   |             |             |             |
| Coughing (n/y)                    | 68.5 ± 16.8 | 66.8 ± 20.3 | 69.2 ± 15.3 |
| % yes                             |             |             |             |
| Dyspnea (n/y)                     | 86/90       | 29/18       | 57/72 *     |
| % yes                             | 51.1 %      | 38.3 %      | 55.8 %      |
| Fatigue (n/y)                     | 113/63      | 22/25       | 91/38 **    |
| % yes                             | 35.8 %      | 53.2 %      | 29.5 %      |
| Pain (n/y)                        | 111/64      | 32/15       | 79/49       |
| % yes                             | 36.6 %      | 31.9 %      | 38.3 %      |
| Inappetenz (n/y)                  | 122/53      | 35/12       | 87/41       |
| % yes                             | 30.3 %      | 25.5 %      | 32.0 %      |
| Loss of taste and smell (n/y)     | 138/38      | 40/7        | 98/31       |
| % yes                             | 21.6 %      | 14.9 %      | 24.0 %      |
| Diarrhoea / vomitting (n/y)       | 163/12      | 46/1        | 117/11      |
| % yes                             | 6.9 %       | 2.1 %       | 8.6 %       |
| Fever (n/y)                       | 147/29      | 40/7        | 107/22      |
| % yes                             | 16.5 %      | 14.9 %      | 17.1 %      |
| Temperature                       | 110/66      | 27/20       | 83/46       |
| % yes                             | 37.5 %      | 42.6 %      | 35.7 %      |
| Neurological Symptoms (n/y) % yes | 37.4 ± 0.9  | 37.2 ± 0.9  | 37.4 ± 0.9  |
| Syncope (n/y)                     | 162/14      | 44/3        | 118/11      |
| % yes                             | 8.0 %       | 6.4 %       | 8.5 %       |
| <b>Preexisting illness</b>        |             |             |             |

|                                  |              |              |               |
|----------------------------------|--------------|--------------|---------------|
| Hypertension (n/y)               | 161/15       | 40/7         | 121/8         |
| % yes                            | 8.5 %        | 14.9 %       | 6.2 %         |
| Blood pressure systolic          | 79/100       | 22/27        | 57/73         |
|                                  | 55.9 %       | 55.1 %       | 56.2 %        |
| Blood pressure diastolic         | 128.5 ± 22.2 | 123.7 ± 24.7 | 130.0 ± 21.2  |
| Cardiac frequency (1/min)        | 76.7 ± 13.2  | 72.4 ± 12.4  | 87.1 ± 13.2 * |
| Diabetes (n/y)                   | 82.2 ± 15.4  | 83.1 ± 14.8  | 81.9 ± 15.7   |
| % yes                            |              |              |               |
| Renal insufficiency (n/y)        | 138/41       | 38/11        | 100/30        |
| % yes                            | 22.9 %       | 22.4 %       | 23.1 %        |
| COPD/Asthma (n/y)                | 146/33       | 39/10        | 107/23        |
| % yes                            | 18.4 %       | 20.4 %       | 17.7 %        |
| Active malignoma (n/y)           | 145/34       | 38/11        | 107/23        |
| % yes                            | 19.0 %       | 22.4 %       | 17.7 %        |
| Inactive malignoma (n/y)         | 168/11       | 47/2         | 121/9         |
| % yes                            | 6.1 %        | 4.1 %        | 6.9 %         |
| Immunosuppression (n/y)          | 164/15       | 48/1         | 116/14 +      |
| % yes                            | 8.4 %        | 2.0 %        | 10.8 %        |
| Obesity (n/y)                    | 132/47       | 36/13        | 96/34         |
| % yes                            | 26.3 %       | 26.5 %       | 26.2 %        |
| Heart disease (n/y)              | 129/49       | 33/16        | 96/33         |
| % yes                            | 27.5 %       | 32.7 %       | 25.6 %        |
| Hypothyreosis (n/y)              | 169/8        | 45/4         | 124/4         |
| % yes                            | 4.5 %        | 8.2 %        | 3.1 %         |
| <b>Blood gas analysis</b>        |              |              |               |
| pO <sub>2</sub>                  | 134/43       | 36/13        | 98/30         |
|                                  | 24.3 %       | 26.5 %       | 23.4 %        |
| pCO <sub>2</sub>                 | 9.7 ± 2.3    | 9.1 ± 2.2    | 10.0 ± 2.3 *  |
| O <sub>2</sub> -Saturation %     | 4.7 ± 0.8    | 4.7 ± 0.9    | 4.7 ± 0.8     |
| <b>Clinical chemistry</b>        |              |              |               |
| Hemoglobin (mM)                  | 8.1 ± 1.2    | 8.0 ± 1.1    | 8.1 ± 1.3     |
| Leukocytes (Gpt/L)               | 6.3 ± 3.3    | 7.3 ± 3.7    | 5.8 ± 3.1 *   |
| Lymphocytes (Gpt/L)              | 1.1 ± 0.5    | 1.2 ± 0.5    | 1.1 ± 0.5     |
| Thrombocytes (Gpt/L)             | 203.8 ± 71.7 | 219.2 ± 91.2 | 194.4 ± 91.6  |
| CRP (mg/L)                       | 44.0 ± 47.7  | 58.9 ± 59.6  | 37.6 ± 40.3 * |
| proBNP (mg/mL)                   | 2173 ± 4271  | 2234 ± 4550  | 2139 ± 4156   |
| Troponin (ng/mL)                 | 0.04 ± 0.10  | 0.05 ± 0.09  | 0.03 ± 0.11   |
| Blood glucose (mM)               | 8.7 ± 13.7   | 10.5 ± 22.1  | 7.7 ± 4.5     |
| Creatinin(μM)                    | 91.6 ± 62.7  | 94.3 ± 65.9  | 90.5 ± 61.6   |
| GFR (mL/min/1.73m <sup>2</sup> ) | 70.8 ± 28.7  | 71.0 ± 34.5  | 70.7 ± 26.1   |
| RT-PCR (Ct)                      | 24.7 ± 5.1   | 27.2 ± 5.3   | 24.0 ± 4.8 ** |
| Hospitalization (d)              | 11.1 ± 10.6  | 16.2 ± 11.9  | 9.2 ± 9.4 **  |
| Death (n/y)                      | 165/16       | 45/6         | 120/10        |
| % yes                            | 11.0 %       | 11.8 %       | 7.7 %         |

| Parameter       | Male        |                              |
|-----------------|-------------|------------------------------|
|                 | All         | untreated      treated       |
| Number          | 165         | 38      127                  |
| Age             | 66.8 ± 16.7 | 66.9 ± 22.0      66.8 ± 15.0 |
| <b>Symptoms</b> |             |                              |
| Coughing (n/y)  | 71/89       | 23/13      48/76 *           |

|                                   |              |              |              |
|-----------------------------------|--------------|--------------|--------------|
| % yes                             | 55.6 %       | 36.1 %       | 61.3 %       |
| Dyspnea (n/y)                     | 116/44       | 22/14        | 94/30 +      |
| % yes                             | 27.5 %       | 38.9 %       | 24.2 %       |
| Fatigue (n/y)                     | 107/53       | 31/5         | 76/48 **     |
| % yes                             | 33.1 %       | 13.9 %       | 38.7 %       |
| Pain (n/y)                        | 119/41       | 32/4         | 37/37 *      |
| % yes                             | 25.6 %       | 11.1 %       | 29.8 %       |
| Inappetenz (n/y)                  | 135/25       | 31/5         | 104/20       |
| % yes                             | 15.6 %       | 13.9 %       | 16.1 %       |
| Loss of taste and smell (n/y)     | 146/14       | 33/3         | 113/11       |
| % yes                             | 8.8 %        | 8.3 %        | 8.9 %        |
| Diarrhoea / vomiting (n/y)        | 144/16       | 34/2         | 110/14       |
| % yes                             | 10.0 %       | 5.6 %        | 11.3 %       |
| Fever (n/y)                       | 101/59       | 22/14        | 79/45        |
| % yes                             | 36.9 %       | 38.9 %       | 36.3 %       |
| Temperature                       | 37.2 ± 1.0   | 37.4 ± 1.0   | 37.2 ± 1.0   |
| Neurological Symptoms (n/y) % yes | 148/12       | 34/2         | 114/10       |
| % yes                             | 7.5 %        | 5.6 %        | 8.1 %        |
| Syncope (n/y)                     | 150/10       | 33/3         | 117/7        |
| % yes                             | 6.3 %        | 8.3 %        | 5.6 %        |
| <b>Risk factors</b>               |              |              |              |
| Hypertension (n/y)                | 61/102       | 17/20        | 44/82        |
| % yes                             | 62.6 %       | 54.1 %       | 65.1 %       |
| Blood pressure systolic           | 128.1 ± 17.8 | 127.0 ± 18.1 | 128.3 ± 17.8 |
| Blood pressure diastolic          | 76.9 ± 12.6  | 75.1 ± 10.3  | 77.2 ± 13.0  |
| Cardiac frequency (1/min)         | 81.3 ± 17.2  | 84.3 ± 17.5  | 80.4 ± 17.1  |
| Diabetes (n/y)                    | 116/47       | 24/13        | 92/34        |
| % yes                             | 28.8 %       | 25.1 %       | 27.0 %       |
| Renal insufficiency (n/y)         | 128/34       | 28/9         | 100/25       |
| % yes                             | 21.0 %       | 24.3 %       | 20.0 %       |
| COPD/Asthma (n/y)                 | 122/40       | 27/10        | 95/30        |
| % yes                             | 24.7 %       | 27.0 %       | 24.0 %       |
| Active malignoma (n/y)            | 143/20       | 32/5         | 111/15       |
| % yes                             | 12.3 %       | 13.5 %       | 11.9 %       |
| Inactive malignoma (n/y)          | 154/8        | 35/2         | 119/6        |
| % yes                             | 4.9 %        | 5.4 %        | 4.8 %        |
| Immunosuppression (n/y)           | 130/29 +     | 32/4         | 98/25        |
| % yes                             | 18.2 %       | 11.1 %       | 20.3 %       |
| Obesity (n/y)                     | 100/60       | 23/14        | 77/46        |
| % yes                             | 37.5 %       | 37.8 %       | 37.4 %       |
| Heart disease (n/y)               | 154/8        | 35/1         | 119/7        |
| % yes                             | 4.9 %        | 2.8 %        | 5.6 %        |
| Hypothyreosis (n/y)               | 149/13 *     | 33/3         | 116/10       |
| % yes                             | 8.0 %        | 8.3 %        | 7.9 %        |
| <b>Blood gas analysis</b>         |              |              |              |
| pO <sub>2</sub>                   | 10.3 ± 3.7 + | 10.5 ± 6.5   | 10.3 ± 2.8   |
| pCO <sub>2</sub>                  | 4.7 ± 0.8    | 4.7 ± 0.8    | 4.7 ± 0.8    |
| O <sub>2</sub> -Saturation %      | 93.5 ± 5.4   | 92.6 ± 6.1   | 93.8 ± 5.1   |
| <b>Clinical chemistry</b>         |              |              |              |
| Hemoglobin (mM)                   | 8.4 ± 1.4 +  | 8.4 ± 1.4    | 8.4 ± 1.4    |

|                                  |                     |                  |                  |
|----------------------------------|---------------------|------------------|------------------|
| Leukocytes (Gpt/L)               | 7.3 ± 7.7           | 8.0 ± 5.3        | 7.0 ± 8.3        |
| Lymphocytes (Gpt/L)              | 1.6 ± 2.4 *         | 1.6 ± 3.0        | 1.6 ± 2.2        |
| Thrombocytes (Gpt/L)             | 197.6 ± 90.5        | 192.7 ± 89.4     | 199.3 ± 91.1     |
| CRP (mg/L)                       | 57.9 ± 64.4 *       | 85.4 ± 80.1      | 49.4 ± 56.4 *    |
| proBNP (mg/mL)                   | 2710 ± 5343         | 2949 ± 6340      | 2567 ± 4729      |
| Troponin (ng/mL)                 | 0.08 ± 0.26         | 0.14 ± 0.48      | 0.06 ± 0.09      |
| Blood glucose (mM)               | 7.7 ± 3.5           | 8.8 ± 4.2        | 7.2 ± 3.0 *      |
| Creatinin(μM)                    | 153.0 ± 177.3<br>** | 143.5 ±<br>156.0 | 156.1 ±<br>184.2 |
| GFR (mL/min/1.73m <sup>2</sup> ) | 66.4 ± 29.5         | 68.7 ± 33.2      | 65.6 ± 28.3      |
| RT-PCR (Ct)                      | 24.7 ± 5.3          | 26.4 ± 4.9       | 24.4 ± 5.4 +     |
| Hospitalization (d)              | 9.6 ± 8.8           | 11.9 ± 9.5       | 8.9 ± 8.6 +      |
| Death (n/y)                      | 145/18              | 26/10            | 119/8 **         |
| % yes                            | 11.0 %              | 27.8 %           | 6.3 %            |
