# Supplementary material
Source: MDPI journal article supplement (https://www.mdpi.com/2036-7449/15/1/13)
Supplement: s1 [file s1]

**Table S4:** Statistical analysis of clinical parameters for hospitalized patients treated with Casirivimab/Imdevimab. Missing data were excluded, causing different numbers for each parameter. Average  $\pm$  standard deviation is shown. For metric parameters, significance was determined using Student's T-test, Cross tables were analysed using Fisher's exact test.  $p < 0.1$ : +;  $p < 0.05$ : \*;  $p < 0.01$ : \*\*. Significance signs in "All" in the female table indicate significant difference to the male sex.

| Parameter                         | All patients     |                  |                  |
|-----------------------------------|------------------|------------------|------------------|
|                                   | All              | untreated        | treated          |
| Number                            | 315              | 90               | 225              |
| Age                               | 67.1 $\pm$ 17.0  | 66.9 $\pm$ 20.9  | 67.2 $\pm$ 15.2  |
| <b>Symptoms</b>                   |                  |                  |                  |
| Coughing (n/y)                    | 146/156          | 52/31            | 94/125 **        |
| % yes                             | 51.7 %           | 37.3 %           | 57.1 %           |
| Dyspnea (n/y)                     | 207/95           | 44/39            | 163/56 **        |
| % yes                             | 31.5 %           | 44.0 %           | 25.6 %           |
| Fatigue (n/y)                     | 201/100          | 63/20            | 138/80 *         |
| % yes                             | 33.2 %           | 24.1 %           | 36.7 %           |
| Pain (n/y)                        | 214/87           | 67/16            | 147/71 *         |
| % yes                             | 28.9 %           | 19.3 %           | 32.6 %           |
| Inappetenz (n/y)                  | 248/54           | 71/12            | 177/42           |
| % yes                             | 17.9 %           | 14.5 %           | 19.2%            |
| Loss of taste and smell (n/y)     | 278/23           | 79/4             | 199/19           |
| % yes                             | 7.6 %            | 4.8 %            | 8.7 %            |
| Diarrhoea / vomiting (n/y)        | 263/39           | 74/9             | 189/30           |
| % yes                             | 12.9 %           | 10.8 %           | 13.7 %           |
| Fever (n/y)                       | 189/113          | 49/34            | 140/79           |
| % yes                             | 37.4 %           | 41.0 %           | 36.1 %           |
| Temperature                       | 37.3 $\pm$ 1.0   | 37.3 $\pm$ 1.0   | 37.3 $\pm$ 1.0   |
| Neurological Symptoms (n/y) % yes | 282/20<br>6.6 %  | 78/5<br>6.0 %    | 204/15<br>6.8 %  |
| Syncope (n/y)                     | 280/22           | 73/10            | 207/12 +         |
| % yes                             | 7.3 %            | 12.0 %           | 5.5 %            |
| <b>Risk factors</b>               |                  |                  |                  |
| Hypertension (n/y)                | 129/178          | 39/47            | 90/131           |
| % yes                             | 58.0 %           | 54.7 %           | 59.3 %           |
| Blood pressure systolic           | 127.7 $\pm$ 20.1 | 124.9 $\pm$ 22.4 | 128.5 $\pm$ 19.3 |
| Blood pressure diastolic          | 67.6 $\pm$ 12.8  | 73.4 $\pm$ 11.7  | 77.5 $\pm$ 13.1  |
| Cardiac frequency (1/min)         | 82.3 $\pm$ 16.6  | 83.5 $\pm$ 15.7  | 81.7 $\pm$ 17.0  |
| Diabetes (n/y)                    | 232/75           | 62/24            | 170/51           |
| % yes                             | 24.4 %           | 27.9 %           | 23.1 %           |
| Renal insufficiency (n/y)         | 248/58           | 67/19            | 181/39           |
| % yes                             | 19.0 %           | 22.1 %           | 17.7 %           |
| COPD/Asthma (n/y)                 | 241/65           | 65/21            | 176/44           |
| % yes                             | 21.2 %           | 24.4 %           | 20.0 %           |
| Active malignoma (n/y)            | 279/28           | 79/7             | 200/21           |
| % yes                             | 9.1 %            | 8.1 %            | 9.5 %            |
| Inactive malignoma (n/y)          | 292/14           | 80/5             | 212/9            |
| % yes                             | 4.6 %            | 5.9 %            | 4.1 %            |
| Immunosuppression (n/y)           | 287/19           | 83/3             | 204/16           |
| % yes                             | 6.2 %            | 3.5 %            | 7.3 %            |

|                                  |               |               |               |
|----------------------------------|---------------|---------------|---------------|
| Obesity (n/y)                    | 240/64        | 68/17         | 172/47        |
| % yes                            | 21.1 %        | 20.0 %        | 21.5 %        |
| Heart disease (n/y)              | 208/98        | 56/30         | 152/68        |
| % yes                            | 32.0 %        | 34.9 %        | 30.9 %        |
| Hypothyreosis (n/y)              | 261/45        | 69/16         | 192/29        |
| % yes                            | 14.7 %        | 18.8 %        | 13.1 %        |
| <b>Blood gas analysis</b>        |               |               |               |
| pO <sub>2</sub>                  | 10.0 ± 3.3    | 9.7 ± 4.5     | 10.2 ± 2.6    |
| pCO <sub>2</sub>                 | 4.7 ± 0.8     | 4.7 ± 0.8     | 4.7 ± 0.8     |
| O <sub>2</sub> -Saturation %     | 93.6 ± 4.9    | 92.3 ± 4.9    | 94.1 ± 4.8    |
| <b>Clinical chemistry</b>        |               |               |               |
| Hemoglobin (mM)                  | 8.3 ± 1.3     | 8.2 ± 1.2     | 8.3 ± 1.3     |
| Leukocytes (Gpt/L)               | 6.9 ± 6.1     | 7.6 ± 4.4     | 6.6 ± 6.4     |
| Lymphocytes (Gpt/L)              | 1.3 ± 1.5     | 1.3 ± 1.9     | 1.2 ± 1.2     |
| Thrombocytes (Gpt/L)             | 200.8 ± 80.6  | 208.4 ± 90.3  | 197.6 ± 76.1  |
| CRP (mg/L)                       | 52.0 ± 57.9   | 69.7 ± 69.5   | 44.4 ± 50.4   |
| proBNP (mg/mL)                   | 2562 ± 4965   | 2543 ± 5348   | 2575 ± 4713   |
| Troponin (ng/mL)                 | 0.06 ± 0.20   | 0.08 ± 0.31   | 0.04 ± 0.11   |
| Blood glucose (mM)               | 8.4 ± 11.1    | 9.8 ± 17.0    | 7.6 ± 4.2     |
| Creatinin(μM)                    | 121.9 ± 139.8 | 115.1 ± 115.0 | 124.8 ± 149.4 |
| GFR (mL/min/1.73m <sup>2</sup> ) | 69.7 ± 29.5   | 70.1 ± 33.8   | 69.5 ± 27.5   |
| PCR (Ct)                         | 24.8 ± 5.0    | 26.7 ± 4.9    | 24.0 ± 4.9    |
| Hospitalization (d)              | 10.3 ± 9.9    | 14.4 ± 11.1   | 8.6 ± 8.9 **  |
| Death (n/y)                      | 276/33        | 71/16         | 205/17 *      |
| % yes                            | 10.7 %        | 18.3 %        | 7.7 %         |

| Parameter                     | Female      |             |             |
|-------------------------------|-------------|-------------|-------------|
|                               | All         | untreated   | treated     |
| Number                        | 169         | 52          | 117         |
| Age                           | 68.1 ± 17.0 | 66.8 ± 20.3 | 68.6 ± 15.5 |
| <b>Symptoms</b>               |             |             |             |
| Coughing (n/y)                | 82/78       | 29/18       | 53/60       |
| % yes                         | 48.8 %      | 38.3 %      | 53.1 %      |
| Dyspnea (n/y)                 | 105/55      | 22/25       | 83/30 **    |
| % yes                         | 34.4 %      | 53.2 %      | 26.5 %      |
| Fatigue (n/y)                 | 103/56      | 32/15       | 71/41       |
|                               | 35.2 %      | 31.9 %      | 36.6 %      |
| Pain (n/y)                    | 111/48      | 35/12       | 76/36       |
| % yes                         | 30.2 %      | 35.5 %      | 32.1 %      |
| Inappetenz (n/y)              | 127/33      | 40/7        | 87/26       |
| % yes                         | 20.6 %      | 14.9 %      | 23.0 %      |
| Loss of taste and smell (n/y) | 147/12      | 46/1        | 101/11      |
| % yes                         | 7.5 %       | 2.1 %       | 9.8 %       |
| Diarrhoea / vomitting (n/y)   | 135/25      | 40/7        | 95/18       |
| % yes                         | 15.6 %      | 14.9 %      | 15.9 %      |
| Fever (n/y)                   | 100/60      | 27/20       | 73/40       |
| % yes                         | 37.5 %      | 42.6 %      | 35.4 %      |
| Temperature                   | 37.4 ± 1.0  | 37.2 ± 0.9  | 37.4 ± 1.0  |
| Neurological Symptoms         | 148/12      | 44/3        | 104/9       |
| (n/y) % yes                   | 7.5%        | 6.4 %       | 8.0 %       |

|                                  |                |              |               |
|----------------------------------|----------------|--------------|---------------|
| Syncope (n/y)                    | 147/13         | 40/7         | 107/6 +       |
| % yes                            | 8.1 %          | 14.9 %       | 5.3 %         |
| <b>Preexisting illness</b>       |                |              |               |
| Hypertension (n/y)               | 72/91          | 22/27        | 50/64         |
| % yes                            | 55.8 %         | 55.1 %       | 56.1 %        |
| Blood pressure systolic          | 127.6 ± 22.4   | 123.7 ± 24.7 | 129.1 ± 21.4  |
| Blood pressure diastolic         | 76.2 ± 13.0    | 72.4 ± 12.4  | 77.6 ± 13.0 * |
| Cardiac frequency (1/min)        | 82.2 ± 16.0    | 83.1 ± 14.8  | 81.8 ± 16.6   |
| Diabetes (n/y)                   | 129/34         | 38/11        | 91/23         |
| % yes                            | 20.9 %         | 22.4 %       | 22.2 %        |
| Renal insufficiency (n/y)        | 134/29         | 39/10        | 95/19         |
| % yes                            | 17.8 %         | 20.4 %       | 16.7 %        |
| COPD/Asthma (n/y)                | 133/30         | 38/11        | 95/19         |
| % yes                            | 18.4 %         | 22.4 %       | 16.7 %        |
| Active malignoma (n/y)           | 154/9 *        | 47/2         | 107/7         |
| % yes                            | 5.5 %          | 4.1 %        | 6.1 %         |
| Inactive malignoma (n/y)         | 155/8          | 45/4         | 110/4         |
| % yes                            | 4.9 %          | 8.2 %        | 3.5 %         |
| Immunosuppression (n/y)          | 150/13         | 48/1         | 102/12        |
| % yes                            | 8.0 %          | 2.0 %        | 10.5 %        |
| Obesity (n/y)                    | 122/41 +       | 36/13        | 86/28         |
| % yes                            | 25.2 %         | 26.5 %       | 24.6 %        |
| Heart disease (n/y)              | 118/45 +       | 33/16        | 85/29         |
| % yes                            | 27.6 %         | 32.7 %       | 25.4 %        |
| Hypothyreosis (n/y)              | 126/37 **      | 35/13        | 90/24         |
| % yes                            | 22.7 %         | 26.5 %       | 21.1 %        |
| <b>Blood gas analysis</b>        |                |              |               |
| pO <sub>2</sub>                  | 9.8 ± 2.4      | 9.1 ± 2.2    | 10.1 ± 2.4 ** |
| pCO <sub>2</sub>                 | 4.7 ± 0.8      | 4.7 ± 0.9    | 4.7 ± 0.8     |
| O <sub>2</sub> -Saturation %     | 93.6 ± 4.2     | 92.1 ± 4.0   | 94.3 ± 4.1 ** |
| <b>Clinical chemistry</b>        |                |              |               |
| Hemoglobin (mM)                  | 8.1 ± 1.2 +    | 8.0 ± 1.1    | 8.2 ± 1.3     |
| Leukocytes (Gpt/L)               | 6.4 ± 3.4      | 7.3 ± 3.7    | 6.0 ± 3.2 *   |
| Lymphocytes (Gpt/L)              | 1.1 ± 0.5      | 1.2 ± 0.5    | 1.1 ± 0.5     |
| Thrombocytes (Gpt/L)             | 206.3 ± 73.0   | 219.2 ± 90.2 | 200.1 ± 62.5  |
| CRP (mg/L)                       | 44.7 ± 49.1 *  | 58.9 ± 59.6  | 37.7 ± 41.7 * |
| proBNP (mg/mL)                   | 2400 ± 4497    | 2239 ± 4550  | 2503 ± 4505   |
| Troponin (ng/mL)                 | 0.04 ± 0.11    | 0.05 ± 0.09  | 0.03 ± 0.12   |
| Blood glucose (mM)               | 8.9 ± 14.4     | 10.5 ± 22.1  | 7.8 ± 4.3     |
| Creatinin(μM)                    | 90.3 ± 64.1 ** | 94.3 ± 65.9  | 88.4 ± 63.4   |
| GFR (mL/min/1.73m <sup>2</sup> ) | 72.2 ± 28.8    | 71.0 ± 34.5  | 72.3 ± 25.7   |
| Hospitalization (d)              | 11.0 ± 10.7    | 16.2 ± 11.9  | 8.8 ± 9.3 **  |
| PCR (Ct)                         | 25.2 ± 5.1     | 27.0 ± 5.1   | 24.3 ± 4.8 ** |
| Death (n/y)                      | 149/16         | 45/6         | 104/10        |
| % yes                            | 9.7 %          | 11.8 %       | 8.8 %         |

| Parameter       |             | Male        |             |
|-----------------|-------------|-------------|-------------|
|                 | All         | untreated   | treated     |
| Number          | 146         | 38          | 108         |
| Age             | 66.1 ± 16.9 | 66.9 ± 22.0 | 65.8 ± 14.9 |
| <b>Symptoms</b> |             |             |             |

|                                   |                |               |                |
|-----------------------------------|----------------|---------------|----------------|
| Coughing (n/y)                    | 64/78          | 23/13         | 41/65 *        |
| % yes                             | 54.9 %         | 36.1 %        | 61.3 %         |
| Dyspnea (n/y)                     | 102/40         | 22/14         | 80/26          |
| % yes                             | 28.2 %         | 38.9 %        | 24.5 %         |
| Fatigue (n/y)                     | 98/44          | 31/5          | 67/39 *        |
| % yes                             | 31.0 %         | 13.9 %        | 36.8 %         |
| Pain (n/y)                        | 103/39         | 32/4          | 71/35 *        |
| % yes                             | 27.5 %         | 11.1 %        | 33.0 %         |
| Inappetenz (n/y)                  | 121/21         | 31/5          | 90/16          |
| % yes                             | 14.8 %         | 13.9 %        | 15.1 %         |
| Loss of taste and smell (n/y)     | 131/11         | 33/3          | 98/8           |
| % yes                             | 7.7 %          | 8.3 %         | 7.5 %          |
| Diarrhoea / vomitting (n/y)       | 128/14         | 34/2          | 94/12          |
| % yes                             | 9.9 %          | 5.6 %         | 11.3 %         |
| Fever (n/y)                       | 89/53          | 22/14         | 67/39          |
| % yes                             | 37.3 %         | 38.9 %        | 36.8 %         |
| Temperature                       | 37.2 ± 1.0     | 37.0 ± 1.0    | 37.2 ± 1.1     |
| Neurological Symptoms (n/y) % yes | 134/8<br>5.6 % | 34/2<br>5.6 % | 100/6<br>5.7 % |
| Syncope (n/y)                     | 133/9          | 33/3          | 100/6          |
| % yes                             | 6.3 %          | 8.3 %         | 5.7 %          |
| <b>Risk factors</b>               |                |               |                |
| Hypertension (n/y)                | 57/87          | 17/20         | 40/67          |
| % yes                             | 60.4 %         | 54.1 %        | 62.6 %         |
| Blood pressure systolic           | 127.7 ± 17.0   | 127.0 ± 18.1  | 127.8 ± 16.9   |
| Blood pressure diastolic          | 77.0 ± 12.7    | 75.1 ± 10.3   | 77.5 ± 13.2    |
| Cardiac frequency (1/min)         | 82.4 ± 17.6    | 84.3 ± 17.5   | 81.7 ± 17.7    |
| Diabetes (n/y)                    | 103/41         | 24/13         | 79/28          |
| % yes                             | 28.5 %         | 25.1 %        | 26.2 %         |
| Renal insufficiency (n/y)         | 114/29         | 28/9          | 86/20          |
| % yes                             | 20.3 %         | 24.3 %        | 18.9 %         |
| COPD/Asthma (n/y)                 | 108/35         | 27/10         | 81/25          |
| % yes                             | 24.5 %         | 27.0 %        | 23.6 %         |
| Active malignoma (n/y)            | 125/19         | 32/5          | 93/14          |
| % yes                             | 13.2 %         | 13.5 %        | 13.1 %         |
| Inactive malignoma (n/y)          | 135/8          | 33/3          | 102/5          |
| % yes                             | 5.6 %          | 8.3 %         | 4.7 %          |
| Immunosuppression (n/y)           | 137/6          | 35/2          | 102/4          |
| % yes                             | 4.2 %          | 5.4 %         | 3.8 %          |
| Obesity (n/y)                     | 118/23         | 32/4          | 86/19          |
| % yes                             | 16.3 %         | 11.1 %        | 18.1 %         |
| Heart disease (n/y)               | 90/53          | 23/14         | 67/39          |
| % yes                             | 37.1 %         | 37.8 %        | 36.8 %         |
| Hypothyreosis (n/y)               | 137/6          | 35/1          | 102/5          |
| % yes                             | 4.2 %          | 2.8 %         | 4.7 %          |
| <b>Blood gas analysis</b>         |                |               |                |
| pO <sub>2</sub>                   | 10.4 ± 4.1     | 10.5 ± 6.5    | 10.3 ± 2.8     |
| pCO <sub>2</sub>                  | 4.7 ± 0.8      | 4.7 ± 0.8     | 4.7 ± 0.8      |
| O <sub>2</sub> -Saturation %      | 93.4 ± 5.6     | 92.6 ± 6.1    | 93.8 ± 5.4     |
| <b>Clinical chemistry</b>         |                |               |                |
| Hemoglobin (mM)                   | 8.4 ± 1.4      | 8.4 ± 1.4     | 8.4 ± 1.4      |
| Leukocytes (Gpt/L)                | 7.4 ± 8.1      | 8.0 ± 5.3     | 7.1 ± 8.9      |

|                                  |               |               |                |
|----------------------------------|---------------|---------------|----------------|
| Lymphocytes (Gpt/L)              | 1.4 ± 2.1     | 1.6 ± 3.0     | 1.4 ± 1.6      |
| Thrombocytes (Gpt/L)             | 194.3 ± 88.6  | 192.7 ± 89.4  | 194.8 ± 88.7   |
| CRP (mg/L)                       | 60.7 ± 66.0   | 85.4 ± 80.1   | 51.6 ± 57.8 ** |
| proBNP (mg/mL)                   | 2808 ± 5638   | 2948 ± 6339   | 2695 ± 5117    |
| Troponin (ng/mL)                 | 0.08 ± 0.28   | 0.14 ± 0.48   | 0.06 ± 0.10    |
| Blood glucose (mM)               | 7.9 ± 3.7     | 8.8 ± 4.2     | 7.3 ± 3.2 +    |
| Creatinin(μM)                    | 159.1 ± 187.9 | 153.5 ± 156.0 | 165.1 ± 199.4  |
| GFR (mL/min/1.73m <sup>2</sup> ) | 66.7 ± 30.2   | 68.7 ± 33.2   | 65.9 ± 29.1    |
| PCR (Ct)                         | 24.4 ± 5.0    | 26.2 ± 4.7    | 23.7 ± 5.0 *   |
| Hospitalization (d)              | 9.4 ± 8.7     | 11.9 ± 9.5    | 8.5 ± 8.3 *    |
| Death (n/y)                      | 127/17        | 26/10         | 101/7 **       |
| % yes                            | 11.8 %        | 27.8 %        | 6.5 %          |
